# Supplementary material for: Proteomic analysis of Plasmodium falciparum parasites from patients with cerebral and uncomplicated malaria
Source: PubMed Central journal article supplement (PMC4887788; doi:10.1038/srep26773), 2016-06-01

## Legend supplementary data

### Proteomic analysis of *Plasmodium falciparum* parasites from patients with cerebral and uncomplicated malaria.

Gwladys I. Bertin <sup>1,2\*</sup>, Audrey Sabbagh <sup>1,2</sup>, Nicolas Argy <sup>1,2,3,4</sup>, Virginie Salnot <sup>2,5</sup>, Sem Ezinmegnon <sup>6</sup>, Gino Agbota <sup>1,2,6</sup>, Yélé Ladipo <sup>7</sup>, Jules M. Alao <sup>7</sup>, Gratien Sagbo <sup>8</sup>, François Guillonneau <sup>2,5</sup>, Philippe Deloron <sup>1,2</sup>

<sup>1</sup> Institut de Recherche pour le Développement (IRD), UMR216 - MERIT, Paris, France.

<sup>2</sup> COMUE Sorbonne Paris Cité, Faculté de Pharmacie de Paris, Paris Descartes University, Paris 75006, France.

<sup>3</sup> Parasitology laboratory, Bichat-Claude Bernard hospital, Paris 75018, France.

<sup>4</sup> French national reference center of malaria laboratory, Bichat-Claude Bernard hospital, Paris 75018, France.

<sup>5</sup> 3P5 Proteomics facility, Université Paris Descartes, Paris, France.

<sup>6</sup> Centre d'Étude et de Recherche sur le Paludisme Associé à la Grossesse et l'Enfance (CERPAGE), Cotonou, Bénin.

<sup>7</sup> Paediatric Department, Mother and child hospital (HOMEL), Cotonou, Benin

<sup>8</sup> Paediatric Department, Centre National Hospitalo-Universitaire (CNHU), Cotonou, Benin

**Figure S1: Proteins selected by each of the three filter-based methods.** Features were ranked according to increasing  $p$ -value (Fisher's ANOVA and runs test) or decreasing weight (ReliefF). Features selected by a single filter are shown in red, while those selected by two or three filters are shown in orange and yellow, respectively.

**Figure S2: STRING 10.0 generated network of CM-associated proteins.** The map shows the evidence view of the network with a high confidence (0.7). Colored lines represent the types of evidence for the association (Green: neighborhood; Red: gene fusion; Blue: co-

occurrence; Grey: co-expression; Pink: experiments; Light blue: database; Yellow: text mining; and Purple: homology). The proteins are identified by their gene names near each sphere.

**Figure S3: STRING 10.0 generated co-expression of CM-associated proteins.** The co-expression view shows the genes that are co-expressed in the same direction. The association score is indicated by a square with a color scale varying from white (no or low co-expression) to brown (high co-expression).

**Figure S1**

| Fisher's ANOVA                                                                  |         |
|---------------------------------------------------------------------------------|---------|
| Number of selected features                                                     | 81      |
| Feature                                                                         | p-value |
| 124513318_conserved Plasmodium protein, unknown function                        | 0.0002  |
| 124809568_conserved Plasmodium protein, unknown function                        | 0.0003  |
| 124810024_conserved Plasmodium protein, unknown function                        | 0.0004  |
| 109692347_SNARE protein                                                         | 0.0012  |
| 13508497_erythrocyte membrane-associated giant protein antigen 332              | 0.0019  |
| 124512554_conserved Plasmodium protein, unknown function                        | 0.0025  |
| 254832737_Antigen 332, DBL-like protein                                         | 0.0062  |
| 124808763_conserved Plasmodium protein, unknown function                        | 0.0062  |
| 124802954_conserved Plasmodium protein                                          | 0.0066  |
| 300633877_unnamed protein product                                               | 0.0073  |
| 23496899_conserved Plasmodium membrane protein                                  | 0.0078  |
| 124505939_Mature parasite-infected erythrocyte surface antigen (MESA) or PfEMP2 | 0.0083  |
| 258597612_Plasmodium exported protein (PHISTb), unknown function                | 0.0089  |
| 300642077_unnamed protein product                                               | 0.0097  |
| 237665024_membrane protein Pf12 precursor                                       | 0.0108  |
| 23496290_conserved Plasmodium protein                                           | 0.0113  |
| 124513434_conserved Plasmodium protein, unknown function                        | 0.0121  |
| 258597772_conserved Plasmodium protein, unknown function                        | 0.0122  |
| 124800697_Plasmodium exported protein                                           | 0.0123  |
| 300536441_unnamed protein product                                               | 0.0126  |
| 124505801_conserved Plasmodium protein, unknown function                        | 0.0126  |
| 160669_S-antigen precursor                                                      | 0.0128  |
| 124802369_conserved Plasmodium protein                                          | 0.0129  |
| 237665420_rhoptry-associated protein 2                                          | 0.0130  |
| 258596969_conserved Plasmodium protein                                          | 0.0130  |
| 81343628_STEVOR                                                                 | 0.0132  |
| 124506797_conserved Plasmodium protein, unknown function                        | 0.0132  |
| 124809472_conserved Plasmodium protein, unknown function                        | 0.0135  |
| 124513290_conserved Plasmodium protein, unknown function                        | 0.0136  |
| 258597785_Sec62, putative                                                       | 0.0153  |
| 23496170_conserved Plasmodium protein                                           | 0.0166  |
| 124511686_conserved Plasmodium membrane protein, unknown function               | 0.0170  |
| 74911696_RING finger protein PFF0185c                                           | 0.0172  |
| 124506685_conserved Plasmodium protein, unknown function                        | 0.0177  |
| 23496149_PfGCN20                                                                | 0.0178  |
| 124809650_conserved Plasmodium protein, unknown function                        | 0.0181  |
| 124810068_conserved Plasmodium protein, unknown function                        | 0.0182  |

| Runs test                                                                       |         |
|---------------------------------------------------------------------------------|---------|
| Number of selected features                                                     | 6       |
| Feature                                                                         | p-value |
| 124800697_Plasmodium exported protein                                           | 0.0014  |
| 124505187_Plasmodium exported protein (PHISTb), unknown function                | 0.0059  |
| 124505185_Plasmodium exported protein (PHISTa), unknown function                | 0.0059  |
| 124512554_conserved Plasmodium protein, unknown function                        | 0.0198  |
| 124810024_conserved Plasmodium protein, unknown function                        | 0.0198  |
| 124505939_Mature parasite-infected erythrocyte surface antigen (MESA) or PfEMP2 | 0.0198  |

| ReliefF                                                                         |          |
|---------------------------------------------------------------------------------|----------|
| Number of selected features                                                     | 37       |
| Feature                                                                         | Weight   |
| 124513318_conserved Plasmodium protein, unknown function                        | 0.357129 |
| 109692347_SNARE protein                                                         | 0.2586   |
| 237665420_rhoptry-associated protein 2                                          | 0.2080   |
| 300633877_unnamed protein product                                               | 0.1911   |
| 124809568_conserved Plasmodium protein, unknown function                        | 0.1903   |
| 23496899_conserved Plasmodium membrane protein                                  | 0.1834   |
| 124810024_conserved Plasmodium protein, unknown function                        | 0.1810   |
| 300642077_unnamed protein product                                               | 0.1745   |
| 124800697_Plasmodium exported protein                                           | 0.1617   |
| 124808763_conserved Plasmodium protein, unknown function                        | 0.1570   |
| 124505939_Mature parasite-infected erythrocyte surface antigen (MESA) or PfEMP2 | 0.1486   |
| 124512554_conserved Plasmodium protein, unknown function                        | 0.1448   |
| 13508497_erythrocyte membrane-associated giant protein antigen 332              | 0.1415   |
| 124506797_conserved Plasmodium protein, unknown function                        | 0.1222   |
| 124505949_skeleton-binding protein 1                                            | 0.1134   |
| 237665024_membrane protein Pf12 precursor                                       | 0.1128   |
| 23497064_rifin                                                                  | 0.1104   |
| 258597785_Sec62, putative                                                       | 0.1102   |
| 124810439_conserved Plasmodium protein, unknown function                        | 0.1102   |
| 81343628_STEVOR                                                                 | 0.1058   |
| 1899003_membrane-associated calcium-binding protein                             | 0.1052   |
| 124800673_Plasmodium exported protein (PHISTb)                                  | 0.1022   |
| 254832737_Antigen 332, DBL-like protein                                         | 0.1010   |
| 124802954_conserved Plasmodium protein                                          | 0.0995   |
| 124802160_conserved Plasmodium protein                                          | 0.0969   |
| 124513440_conserved Plasmodium protein, unknown function                        | 0.0966   |
| 124505185_Plasmodium exported protein (PHISTa), unknown function                | 0.0918   |
| 86170403_conserved Plasmodium protein, unknown function                         | 0.0796   |
| 124513956_conserved protein, unknown function                                   | 0.0794   |
| 296005544_conserved Plasmodium protein, unknown function                        | 0.0791   |
| 124507285_rifin                                                                 | 0.0758   |
| 124512140_Plasmodium exported protein, unknown function                         | 0.0753   |
| 237665346_Pf13_0192-like hypothetical protein                                   | 0.0749   |
| 86170346_rifin                                                                  | 0.0710   |
| 124810068_conserved Plasmodium protein, unknown function                        | 0.0709   |
| 124809650_conserved Plasmodium protein, unknown function                        | 0.0706   |
| 124506685_conserved Plasmodium protein, unknown function                        | 0.0700   |

|                                                                  |        |
|------------------------------------------------------------------|--------|
| 296005544_conserved Plasmodium protein, unknown function         | 0.0185 |
| 296004822_conserved Plasmodium protein, unknown function         | 0.0190 |
| 124800673_Plasmodium exported protein (PHISTb)                   | 0.0204 |
| 86170439_conserved Plasmodium protein, unknown function          | 0.0216 |
| 23496948_conserved Plasmodium protein                            | 0.0217 |
| 23496217_conserved Plasmodium protein                            | 0.0224 |
| 86171075_conserved Plasmodium protein, unknown function          | 0.0224 |
| 124808483_conserved Plasmodium protein, unknown function         | 0.0228 |
| 23496317_conserved Plasmodium protein                            | 0.0234 |
| 23496157_conserved Plasmodium protein                            | 0.0234 |
| 296004702_conserved Plasmodium protein, unknown function         | 0.0238 |
| 23496602_conserved Plasmodium protein                            | 0.0239 |
| 259495129_Protein PFF0380w                                       | 0.0245 |
| 23496365_conserved Plasmodium protein                            | 0.0247 |
| 264675902_Uncharacterized protein PF14_0444                      | 0.0248 |
| 124808362_conserved Plasmodium protein, unknown function         | 0.0253 |
| 300666210_unnamed protein product                                | 0.0272 |
| 296005351_conserved Plasmodium protein, unknown function         | 0.0280 |
| 124512140_Plasmodium exported protein, unknown function          | 0.0280 |
| 311816438_unnamed protein product                                | 0.0284 |
| 124512544_conserved Plasmodium protein, unknown function         | 0.0294 |
| 124810593_stevor, putative                                       | 0.0298 |
| 23495975_NOT family protein, putative                            | 0.0318 |
| 23496557_conserved Plasmodium protein                            | 0.0319 |
| 124513370_conserved Plasmodium protein, unknown function         | 0.0325 |
| 23496358_conserved Plasmodium protein                            | 0.0340 |
| 23496268_conserved Plasmodium protein                            | 0.0345 |
| 254832645_conserved Plasmodium protein                           | 0.0348 |
| 296005337_conserved Plasmodium protein, unknown function         | 0.0355 |
| 296005560_conserved Plasmodium protein, unknown function         | 0.0358 |
| 258549073_conserved Plasmodium protein                           | 0.0361 |
| 124505949_skeleton-binding protein 1                             | 0.0368 |
| 124505751_conserved Plasmodium protein, unknown function         | 0.0368 |
| 238630798_rhoptry associated membrane antigen                    | 0.0370 |
| 124511764_conserved Plasmodium protein, unknown function         | 0.0386 |
| 23497064_rifin                                                   | 0.0398 |
| 124505181_Plasmodium exported protein (PHISTb), unknown function | 0.0399 |
| 238630760_rhoptry associated membrane antigen                    | 0.0403 |
| 124810439_conserved Plasmodium protein, unknown function         | 0.0439 |
| 124507099_conserved Plasmodium protein, unknown function         | 0.0450 |
| 258597113_conserved Plasmodium protein                           | 0.0457 |
| 124513746_conserved Plasmodium protein, unknown function         | 0.0470 |
| 124512900_conserved Plasmodium protein, unknown function         | 0.0485 |
| 124505785_conserved Plasmodium protein, unknown function         | 0.0493 |

Figure S2

Network with a high confidence (0.7)

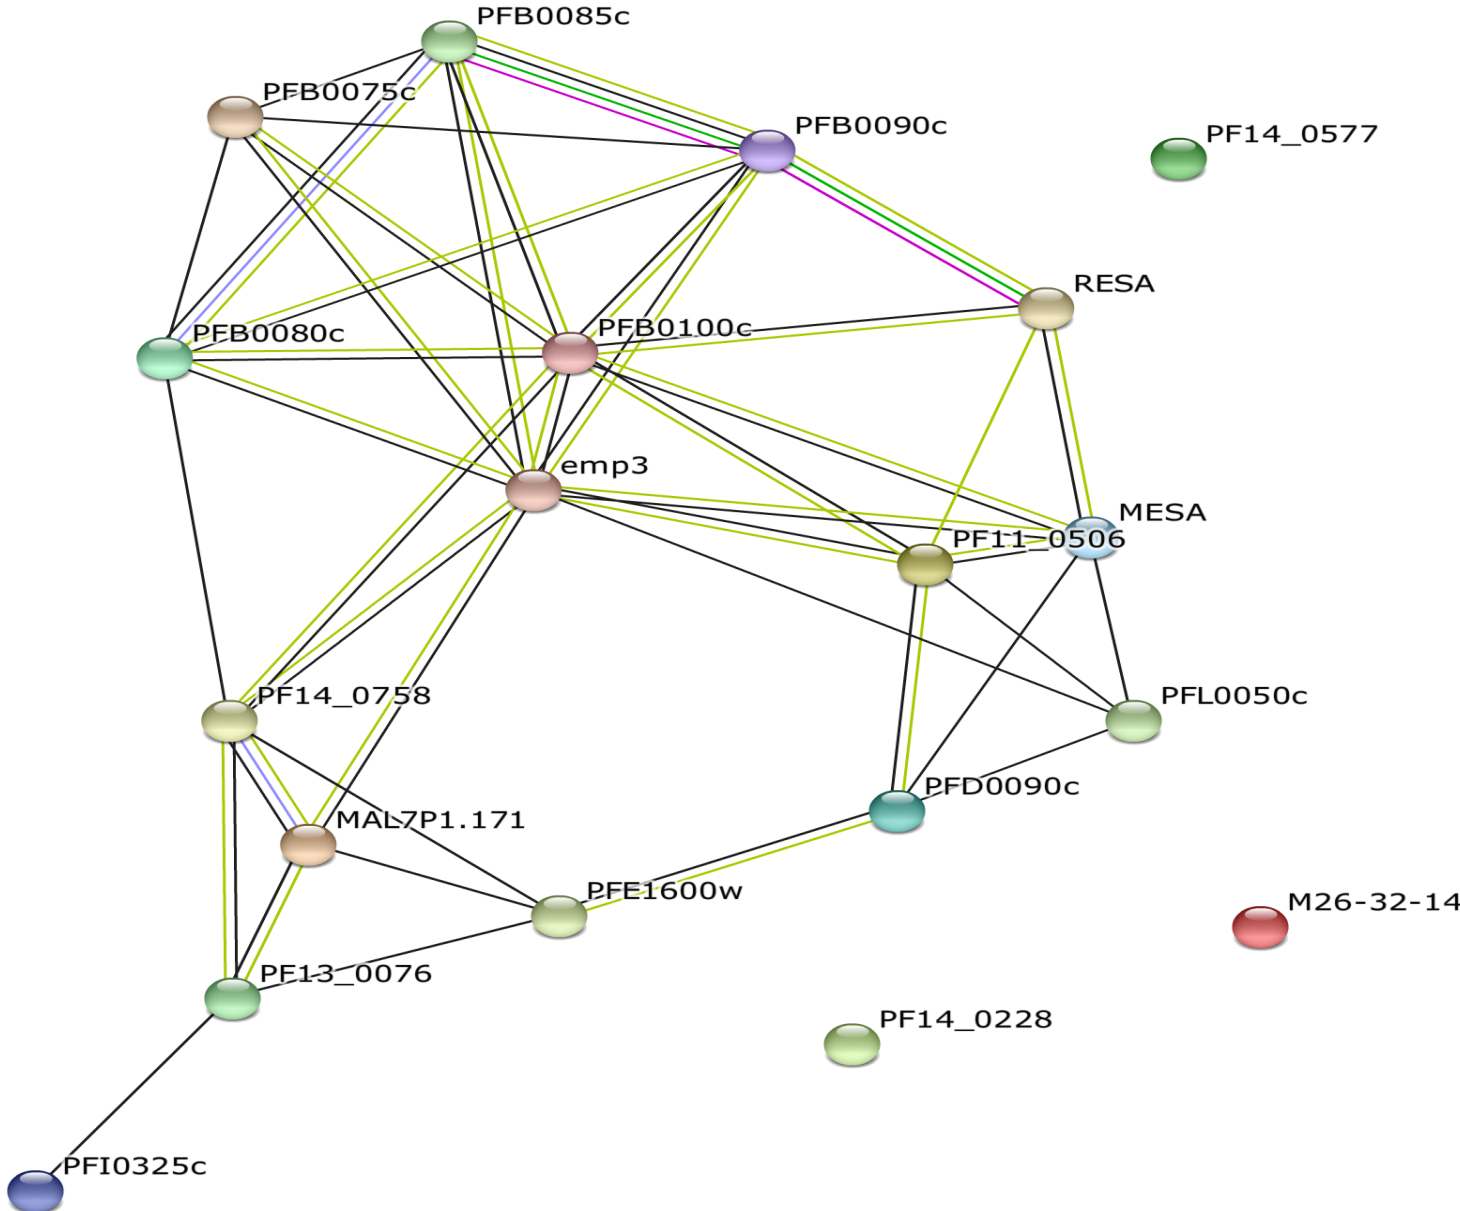

Supplement: srep26773-s1.pdf [file srep26773-s1.pdf]
